# Supplementary material
Source: PubMed Central journal article supplement (PMC7939125)
Supplement: ehp7102.s001.acco.pdf [file ehp7102.s001.acco.pdf]

**Note to readers with disabilities:** *EHP* strives to ensure that all journal content is accessible to all readers. However, some figures and Supplemental Material published in *EHP* articles may not conform to [508 standards](#) due to the complexity of the information being presented. If you need assistance accessing journal content, please contact [ehp508@niehs.nih.gov](mailto:ehp508@niehs.nih.gov). Our staff will work with you to assess and meet your accessibility needs within 3 working days.

### **Supplemental Material**

#### **Aggressiveness and Metastatic Potential of Breast Cancer Cells Co-Cultured with Preadipocytes and Exposed to an Environmental Pollutant Dioxin: An *in Vitro* and *in Vivo* Zebrafish Study**

Meriem Koual, Céline Tomkiewicz, Ida Chiara Guerrero, David Sherr, Robert Barouki, and Xavier Coumoul

#### **Table of Contents**

**Figure S1. Semi-quantitation of E-Cadherin mRNA in MCF-7 cells.** MCF7 cells were grown with hMADS and/or treated with 25nM TCDD for 48h (Control (vehicle MCF-7 cells, alone), TCDD (MCF-7 cells treated with 25nM TCDD), coculture (MCF-7 co-cultured with hMADS) and coexposure (co-culture with TCDD)). Relative levels (compared to the control) of E-Cadherin mRNA were measured by real-time qPCR. Graph represent means  $\pm$  SEM of 5 measurements. The numerical information mean  $\pm$  SEM and p-values are provided in Table S9. (Kruskal–Wallis’s H test (nonparametric comparison of k independent series) followed by a 1-factor ANOVA test (parametric comparison of k independent series), \*\* p<0.01, \*p<0.05).

**Figure S2. Cell death, senescence, proliferation, or autophagy measurements.** MCF7 cells were grown with hMADS and/or treated with 25nM TCDD for 48h (Control (vehicle MCF-7 cells, alone), TCDD (MCF-7 cells treated with 25nM TCDD), coculture (MCF-7 co-cultured with hMADS) and coexposure (co-culture with TCDD)). **(A)** Quantification of MCF7 apoptosis using annexin V-FITC (y-axis)/PI staining(x-axis). (a) Flow cytometer results: cells were classified as early apoptotic cells (Annexin V+, PI-), late apoptotic cells (Annexin V+, PI+), and damaged cells (Annexin V-, PI+). (b) Percentage of cells from (a) under each different experimental condition. Graph represent means  $\pm$  SEM of 5 measurements. **(B)** q-RT-PCR experiments quantifying apoptosis and autophagy biomarkers. Relative levels compared to the control of mRNA expression of ATG5, ATG7 and BAX by real-time qPCR. Graph represent means  $\pm$  SEM of 5 measurements. **(C)** Quantification of MCF-7 proliferation using the AlamarBlue assay. Mean absorbance is indicated for each condition as a horizontal bar and statistically significant differences were determined by ANOVA and indicated as P values above the comparison, bars, SD. N=3. The numerical information mean  $\pm$  SEM and p-values are provided in Table S5, S6 and S7. (Kruskal–Wallis’s H test (nonparametric comparison of k independent series) followed by a 1-factor ANOVA test (parametric comparison of k independent series, \*\* p<0.01; \* p<0.05). **(D)** Senescence-associated  $\beta$ -galactosidase activity. The blue-stained cells and the total number of cells were observed.10X magnification (1 field par well). The pictures are representative of at least 3 different experiments.

**Table S1. Numerical data mean  $\pm$  SEM and p-values for Figure 1C: Cell index and p-values for MCF-7 cells under control, TCDD, coculture, or coexposure conditions using the xCELLigence system.**

[a] Data presented are mean of 6 experiments.

[b] p-values calculated via Kruskal–Wallis’s H test (nonparametric comparison of k independent series) followed by a 1-factor ANOVA test (parametric comparison of k independent series), All conditions compared to control.

**Table S2. Numerical data mean  $\pm$  SEM and p-values for Figure 2B: ALDH enzymatic analysis for MCF-7 cells under control, TCDD, coculture, or coexposure conditions.**

[a] Data presented are mean of 6 experiments.

[b] p-values calculated via Kruskal–Wallis’s H test (nonparametric comparison of k independent series) followed by a 1-factor ANOVA test (parametric comparison of k independent series), All conditions compared to control.

**Table S3. Numerical data mean +/- SEM and p-values for Figure 3: Tumorsphere or spheroid area ( $\mu\text{m}^2$ ) of MCF-7 cells under control, TCDD, coculture, or coexposure conditions.**

[a] Data presented are mean of 14-39 measurements on 3 experiments.

[b] p-values calculated via Kruskal–Wallis’s H test (nonparametric comparison of k independent series) followed by a 1-factor ANOVA test (parametric comparison of k independent series), All conditions compared to control.

**Table S4. Numerical data mean +/- SEM and p-values for Figure 4: Quantitation of cell number and giant cells (very large cells with multiple nuclei) per field (N=3 field per conditions) in MCF-7 cells under control, TCDD, coculture, or coexposure conditions.**

[a] Data presented are mean of 3 field in 3 experiments.

[b] p-values calculated via Kruskal–Wallis’s H test (nonparametric comparison of k independent series) followed by a 1-factor ANOVA test (parametric comparison of k independent series), All conditions were compared to control.

**Table S5. Numerical data mean +/- SEM and p-values for Figure S2A-a: Percentage of MCF-7 cells that were classified as early apoptotic cells (Annexin V+, PI-), late apoptotic cells (Annexin V+, PI+), and damaged cells (Annexin V-, PI+) using flow cytometry.**

[a] Data presented are mean of 5 experiments.

[b] p-values calculated via Kruskal–Wallis’s H test (nonparametric comparison of k independent series) followed by a 1-factor ANOVA test (parametric comparison of k independent series), All conditions were compared to control.

**Table S6. Numerical data means +/- SEM and p-values for Figure S2B: mRNA expression of ATG7, ATG5, and Bax in MCF-7 cells under control, TCDD, coculture, or coexposure conditions as determined by q-RT-PCR.**

[a] Data presented are mean of 5 experiments.

[b] p-values calculated via Kruskal–Wallis’s H test (nonparametric comparison of k independent series) followed by a 1-factor ANOVA test (parametric comparison of k independent series), All conditions were compared to control.

**Table S7. Numerical data means +/- SEM and p-values for Figure S2C: Quantification of proliferation of MCF-7 cells under control, TCDD, coculture, or coexposure conditions as determined using the AlamarBlue assay. Absorbance measured at 540 nm.**

[a] Data presented are mean of 3 experiments.

[b] p-values calculated via Kruskal–Wallis’s H test (nonparametric comparison of k independent series) followed by a 1-factor ANOVA test (parametric comparison of k independent series), All conditions were compared to control.

**Table S8. Numerical data means +/- SEM and p-values for figure 6B-b.**

[a] Data presented are mean of 3 experiments. The total number of fish injected with CM-Dil-labelled MCF-7 was: control (N=32), TCDD (N=21), Coculture (N=36) and Coexposure (N=34). The total number of fish injected with RFP-labelled MDA-MB-231 cells was: control (N=46), TCDD (N=41), Coculture (N=24) and Coexposure (N=42).

[b] p-values calculated via Kruskal–Wallis’s H test (nonparametric comparison of k independent series) followed by a 1-factor ANOVA test (parametric comparison of k independent series), All conditions were compared to control.

**Table S9. Numerical data means +/- SEM and p-values for Figure S1.**

[a] Data presented are mean of 5 experiments.

[b] p-values calculated via Kruskal–Wallis’s H test (nonparametric comparison of k independent series) followed by a 1-factor ANOVA test (parametric comparison of k independent series), All conditions were compared to control.

**Additional File-** Excel Document

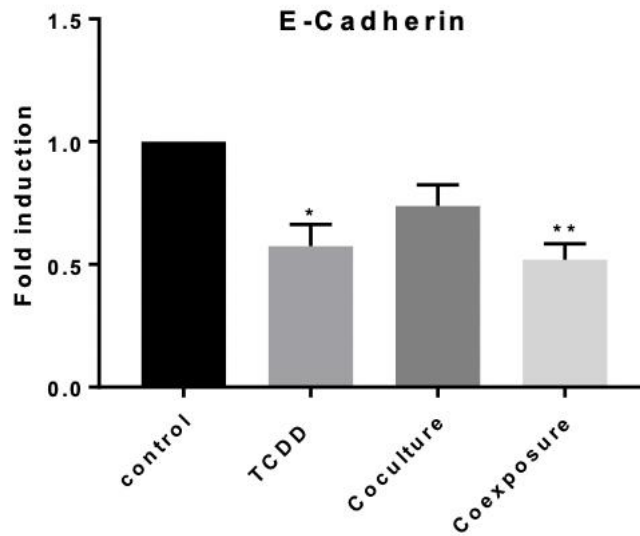

**Figure S1: semi-quantitation of E-Cadherin mRNA in MCF-7 cells.**

MCF7 cells were grown with hMADS and/or treated with 25nM TCDD for 48h (Control (vehicle MCF-7 cells, alone), TCDD (MCF-7 cells treated with 25nM TCDD), coculture (MCF-7 co-cultured with hMADS) and coexposure (co-culture with TCDD)). Relative levels (compared to the control) of E-Cadherin mRNA were measured by real-time qPCR. Graph represent means  $\pm$  SEM of 5 measurements. The numerical information mean  $\pm$  SEM and p-values are provided in Table S9. (Kruskal–Wallis’s H test (nonparametric comparison of k independent series) followed by a 1-factor ANOVA test (parametric comparison of k independent series), \*\*  $p < 0.01$ , \*  $p < 0.05$ ).

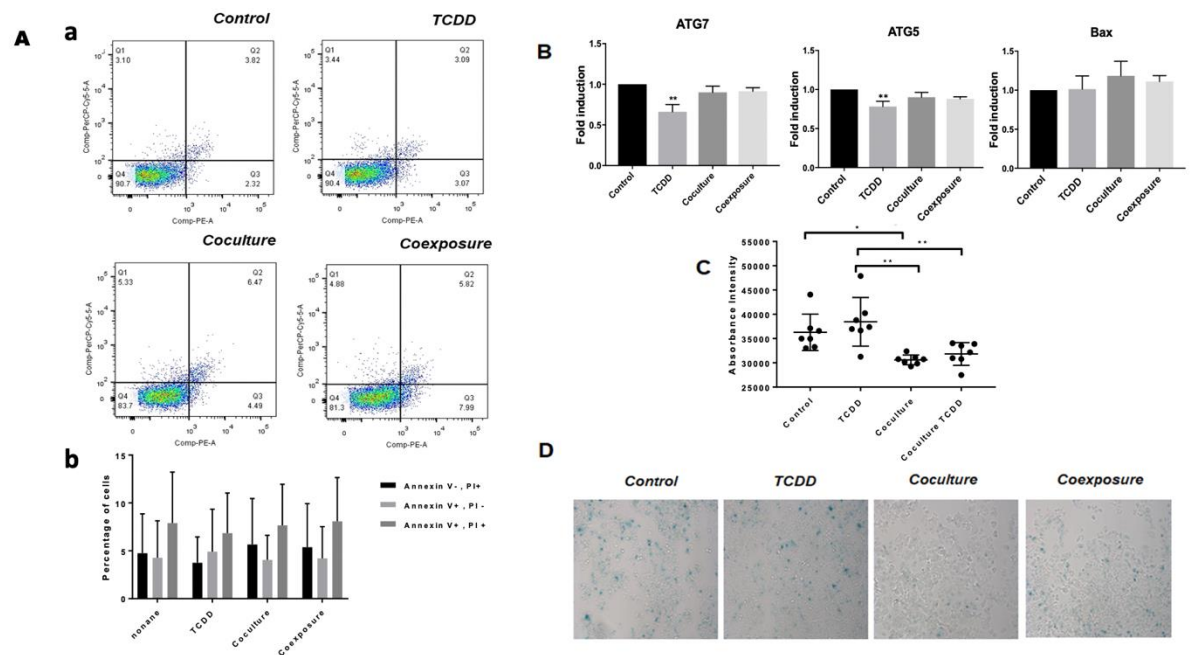

**Figure S2: Cell death, senescence, proliferation, or autophagy measurements.**

MCF7 cells were grown with hMADS and/or treated with 25nM TCDD for 48h (Control (vehicle MCF-7 cells, alone), TCDD (MCF-7 cells treated with 25nM TCDD), coculture (MCF-7 co-cultured with hMADS) and coexposure (co-culture with TCDD)). **(A)** Quantification of MCF7 apoptosis using annexin V-FITC (y-axis)/PI staining(x-axis). **(a)** Flow cytometer results: cells were classified as early apoptotic cells (Annexin V+, PI-), late apoptotic cells (Annexin V+, PI+), and damaged cells (Annexin V-, PI+). **(b)** Percentage of cells from (a) under each different experimental condition. Graph represent means  $\pm$  SEM of 5 measurements. **(B)** q-RT-PCR experiments quantifying apoptosis and autophagy biomarkers. Relative levels compared to the control of mRNA expression of ATG5, ATG7 and BAX by real-time qPCR. Graph represent means  $\pm$  SEM of 5 measurements. **(C)** Quantification of MCF-7 proliferation using the AlamarBlue assay. Mean absorbance is indicated for each condition as a horizontal bar and statistically significant differences were determined by ANOVA and indicated as P values above the comparison, bars, SD. N=3. The numerical information mean  $\pm$  SEM and p-values are provided in Table S5, S6 and S7. (Kruskal–Wallis’s H test (nonparametric comparison of k independent series) followed by a 1-factor ANOVA test (parametric comparison of k independent series, \*\* p<0.01; \* p<0.05). **(D)** Senescence-associated  $\beta$ -galactosidase activity. The blue-stained cells and the total number of cells were observed.10X magnification (1 field par well). The pictures are representative of at least 3 different experiments.

|            | Slope/Slope control |             |
|------------|---------------------|-------------|
|            | Mean +/-SEM (a)     | p-value (b) |
| TCDD       | 113.61+/-12.93      | 0.6215      |
| Coculture  | 45.83 +/- 7.18      | 0.0121      |
| Coexposure | 37.91 +/- 4.88      | 0.0035      |

**Table S1. Numerical data mean +/- SEM and p-values for Figure 1C: Cell index and p-values for MCF-7 cells under control, TCDD, coculture, or coexposure conditions using the xCELLigence system**

[a] Data presented are mean of 6 experiments

[b] p-values calculated via Kruskal–Wallis’s H test (nonparametric comparison of k independent series) followed by a 1-factor ANOVA test (parametric comparison of k independent series), All conditions compared to control.

|            | ALDH positive cells<br>(% compared to the control) |             |
|------------|----------------------------------------------------|-------------|
|            | Mean +/-SEM (a)                                    | p-value (b) |
| TCDD       | 407.9+/-136.8                                      | 0.0292      |
| Coculture  | 110.9 +/- 28.44                                    | 0.805       |
| Coexposure | 606.1 +/- 194                                      | 0.0027      |

**Table S2. Numerical data mean +/- SEM and p-values for Figure 2B: ALDH enzymatic analysis for MCF-7 cells under control, TCDD, coculture, or coexposure conditions**

[a] Data presented are mean of 6 experiments

[b] p-values calculated via Kruskal–Wallis’s H test (nonparametric comparison of k independent series) followed by a 1-factor ANOVA test (parametric comparison of k independent series), All conditions compared to control.

|            | Spheroid Area ( $\mu\text{m}^2$ ) |             |
|------------|-----------------------------------|-------------|
|            | Mean +/-SEM (a)                   | p-value (b) |
| Control    | 9228 +/- 1155                     |             |
| TCDD       | 12125 +/-1035                     | 0.3441      |
| Coculture  | 67205 +/- 13398                   | <0.0001     |
| Coexposure | 46675 +/-5468                     | <0.0001     |

**Table S3. Numerical data mean +/- SEM and p-values for Figure 3: Tumorsphere or spheroid area ( $\mu\text{m}^2$ ) of MCF-7 cells under control, TCDD, coculture, or coexposure conditions**

[a] Data presented are mean of 14-39 measurements on 3 experiments

[b] p-values calculated via Kruskal–Wallis’s H test (nonparametric comparison of k independent series) followed by a 1-factor ANOVA test (parametric comparison of k independent series), All conditions compared to control.

|            | Cell number per field |             |
|------------|-----------------------|-------------|
|            | Mean +/-SEM (a)       | p-value (b) |
| Control    | 113+/-10.02           |             |
| TCDD       | 46.33+/-11.02         | 0.3204      |
| Coculture  | 42.67 +/- 1.66        | >0.9999     |
| Coexposure | 31.67 +/- 4.33        | 0.027       |

|            | Giant Cells per field |             |
|------------|-----------------------|-------------|
|            | Mean +/-SEM (a)       | p-value (b) |
| Control    | 0                     |             |
| TCDD       | 1+/-0                 | 0.9485      |
| Coculture  | 1+/- 0.5774           | >0.9999     |
| Coexposure | 3.333 +/- 0.33        | 0.0162      |

**Table S4. Numerical data mean +/- SEM and p-values for Figure 4: Quantitation of cell number and giant cells (very large cells with multiple nuclei) per field (N=3 field per conditions) in MCF-7 cells under control, TCDD, coculture, or coexposure conditions**

[a] Data presented are mean of 3 field in 3 experiments

[b] p-values calculated via Kruskal–Wallis’s H test (nonparametric comparison of k independent series) followed by a 1-factor ANOVA test (parametric comparison of k independent series), All conditions were compared to control.

|            | Annexin V- . PI+ |             | Annexin V+ . PI - |             | Annexin V+ . PI + |             |
|------------|------------------|-------------|-------------------|-------------|-------------------|-------------|
|            | Mean +/-SEM (a)  | p-value (b) | Mean +/-SEM (a)   | p-value (b) | Mean +/-SEM (a)   | p-value (b) |
| Control    | 4.742+/-1.839    |             | 4.264+/-1.729     |             | 7.89+/-2.381      |             |
| TCDD       | 3.744+/-1.207    | 0.8307      | 4.902+/-1.987     | 0.6492      | 6.846+/-1.869     | 0.7083      |
| Coculture  | 5.652+/-2.146    | 0.6305      | 4.048+/-1.151     | 0.8725      | 7.662+/-1.916     | >0.9999     |
| Coexposure | 5.382+/-2.033    | 0.6305      | 4.212+/-1.476     | 0.8097      | 8.07+/-2.044      | 0.9574      |

**Table S5 : Numerical data mean +/- SEM and p-values for Figure S2A-a: Percentage of MCF-7 cells that were classified as early apoptotic cells (Annexin V+, PI-), late apoptotic cells (Annexin V+, PI+), and damaged cells (Annexin V-, PI+) using flow cytometry.**

[a] Data presented are mean of 5 experiments

[b] p-values calculated via Kruskal–Wallis’s H test (nonparametric comparison of k independent series) followed by a 1-factor ANOVA test (parametric comparison of k independent series), All conditions were compared to control



|            | ATG7 Expression<br>(compared to the control) |             | ATG5 Expression<br>(compared to the control) |             | Bax Expression<br>(compared to the control) |             |
|------------|----------------------------------------------|-------------|----------------------------------------------|-------------|---------------------------------------------|-------------|
|            | Mean +/-SEM (a)                              | p-value (b) | Mean +/-SEM (a)                              | p-value (b) | Mean +/-SEM (a)                             | p-value (b) |
| Control    | 1                                            |             | 1                                            |             | 1                                           |             |
| TCDD       | 0.662+/-0.088                                | 0.0015      | 0.782+/-0.067                                | 0.009       | 1.014+/-0.1687                              | 0.8084      |
| Coculture  | 0.9 +/- 0.076                                | 0.1459      | 0.902 +/- 0.061                              | 0.1613      | 1.184 +/- 0.1872                            | 0.5005      |
| Coexposure | 0.914 +/- 0.044                              | 0.1961      | 0.88 +/- 0.026                               | 0.0558      | 1.112 +/- 0.074                             | 0.2357      |

**Table S6 :** Numerical data means +/- SEM and p-values for Figure S2B: mRNA expression of ATG7, ATG5, and Bax in MCF-7 cells under control, TCDD, coculture, or coexposure conditions as determined by q-RT-PCR

[a] Data presented are mean of 5 experiments

[b] p-values calculated via Kruskal–Wallis’s H test (nonparametric comparison of k independent series) followed by a 1-factor ANOVA test (parametric comparison of k independent series), All conditions were compared to control

|            | Absorbance intensity |             |
|------------|----------------------|-------------|
|            | Mean +/-SEM (a)      | p-value (b) |
| Control    | 36283+/-1420         |             |
| TCDD       | 38451+/-1893         | 0.4747      |
| Coculture  | 30615 +/- 377.8      | 0.0025      |
| Coexposure | 31833 +/- 833        | 0.0552      |

**Table S7** : Numerical data means +/- SEM and p-values for Figure S2C: Quantification of proliferation of MCF-7 cells under control, TCDD, coculture, or coexposure conditions as determined using the AlamarBlue assay. Absorbance measured at 540 nm

[a] Data presented are mean of 3 experiments

[b] p-values calculated via Kruskal–Wallis’s H test (nonparametric comparison of k independent series) followed by a 1-factor ANOVA test (parametric comparison of k independent series), All conditions were compared to control.

|            | Metastasis/Fish |             |
|------------|-----------------|-------------|
|            | Mean +/-SEM (a) | p-value (b) |
| Control    | 12.7+/-2.044    |             |
| TCDD       | 6.167+/-1.447   | 0.1101      |
| Coculture  | 15.06+/-2.167   | 0.5133      |
| Coexposure | 21.72+/-2.286   | 0.0257      |

  

|            | Metastasis/Fish |             |
|------------|-----------------|-------------|
|            | Mean +/-SEM (a) | p-value (b) |
| Control    | 10.21+/-1.178   |             |
| TCDD       | 8.417+/-1.323   | 0.2547      |
| Coculture  | 8.556+/-0.9734  | 0.4811      |
| Coexposure | 15.95+/-2.136   | 0.0147      |

**Table S8**: Numerical data means +/- SEM and p-values for figure 6B-b

[a] Data presented are mean of 3 experiments. The total number of fish injected with CM-Dil-labelled MCF-7 was: control (N=32), TCDD (N=21), Coculture (N=36) and Coexposure (N=34). The total number of fish injected with RFP-labelled MDA-MB-231 cells was: control (N=46), TCDD (N=41), Coculture (N=24) and Coexposure (N=42).

[b] p-values calculated via Kruskal–Wallis’s H test (nonparametric comparison of k independent series) followed by a 1-factor ANOVA test (parametric comparison of k independent series), All conditions were compared to control

|            | E-Cadherin Expression<br>(compared to the control) |             |
|------------|----------------------------------------------------|-------------|
|            | Mean +/-SEM (a)                                    | p-value (b) |
| Control    | 1                                                  |             |
| TCDD       | 0.574+/-0.088                                      | 0.0105      |
| Coculture  | 0.738 +/- 0.086                                    | 0.1457      |
| Coexposure | 0.52 +/- 0.064                                     | 0.0028      |

**Table S9: Numerical data means +/- SEM and p-values for Figure S1**

[a] Data presented are mean of 5 experiments

[b] p-values calculated via Kruskal–Wallis’s H test (nonparametric comparison of k independent series) followed by a 1-factor ANOVA test (parametric comparison of k independent series), All conditions were compared to control
